# Supplementary material for: Information integration in large brain networks
Source: PubMed Central journal article supplement (PMC6382174; doi:10.1371/journal.pcbi.1006807), 2019-02-07
Supplement: pcbi.1006807.s002.pdf [file pcbi.1006807.s002.pdf]

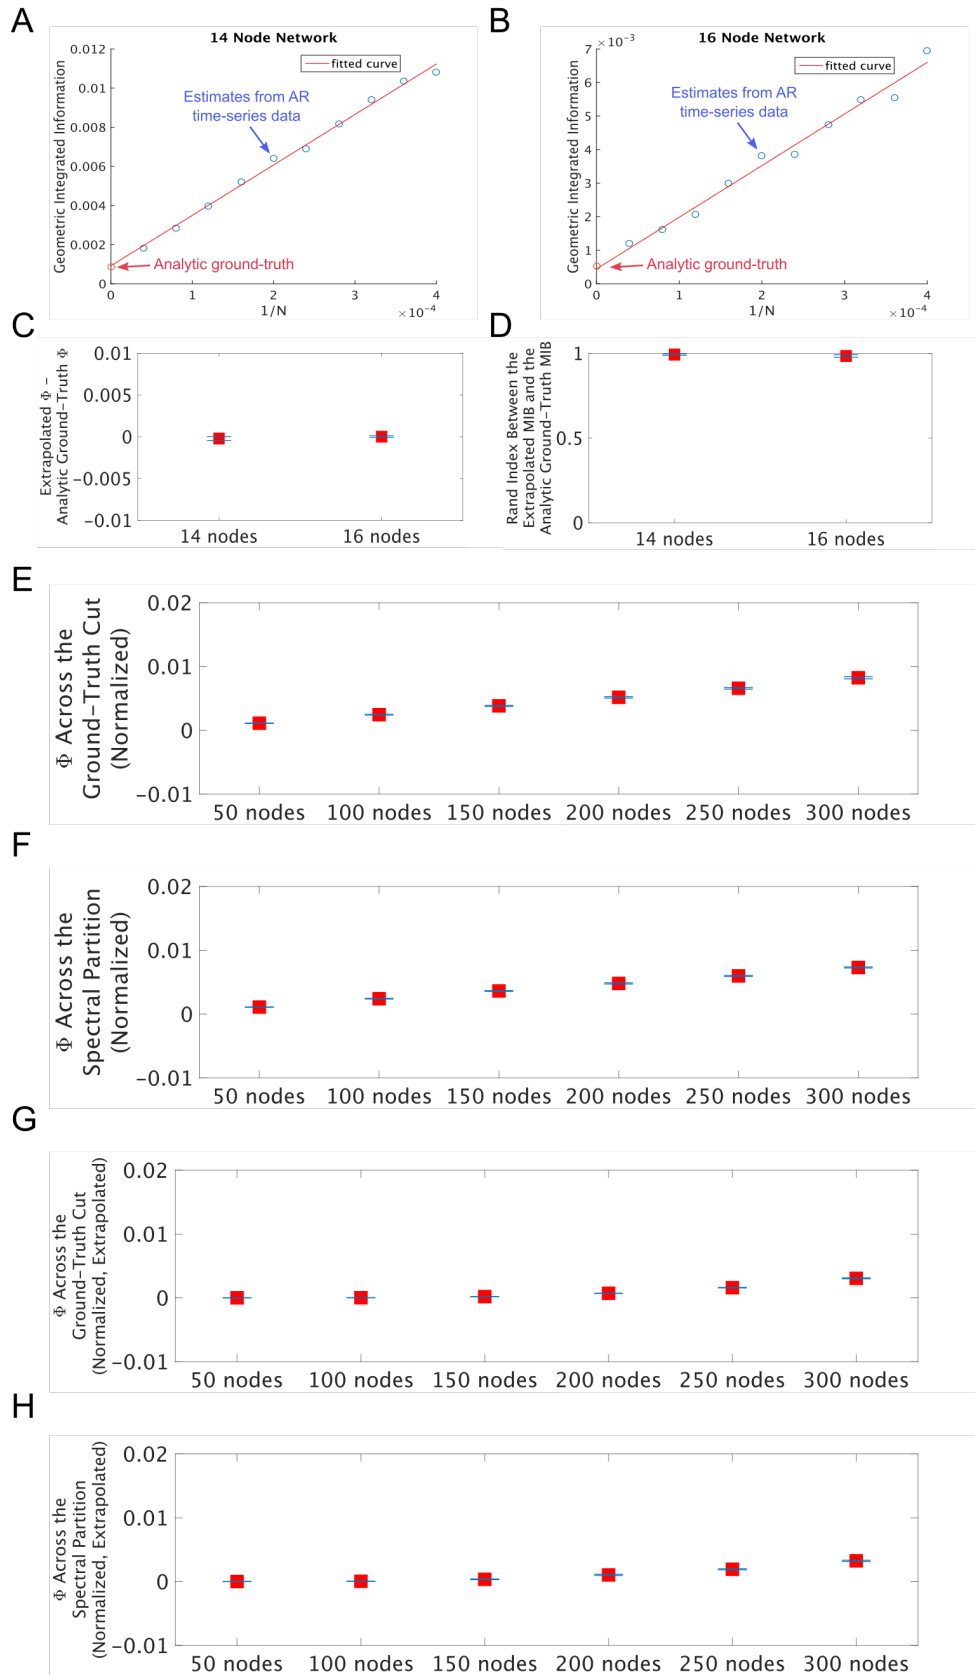

(Caption on next page.)

**S1 Figure. Results of extrapolation analysis.** In the absence of infinite data, integrated information can be accurately estimated from finite time-series data. Following well-established for estimating entropy and mutual information from finite time-series data, we calculate integrated information from time-series data as a function of  $1/N$ , where  $N$  is the number of observations. We then fit a line to this distribution of estimated values, and estimate integrated information as the value of the line at  $1/N = 0$ . **A** A sample of measurements of  $\Phi^G$  as a function of  $1/N$  in a 14-node autoregressive system. The orange circle on the y-axis is the analytic ground-truth value of  $\Phi^G$  in this system, and the y-intercept of the line fitted to estimates of  $\Phi^G$  from sub-sampled time-series data is the estimate of  $\Phi^G$  extrapolated to infinite observations (i.e. where  $1/N=0$ ). Note that the value of the fitted line at  $1/N = 0$  is remarkably close to the analytic ground-truth value. **B** A sample estimate of integrated information from a 16-node autoregressive system. **C** We generated autoregressive time-series data from 60 14-node networks and 60 16-node networks, and then compared our extrapolated estimates of integrated information to the analytic ground-truth for those systems. Our extrapolated estimates were highly accurate: the mean absolute error for the 14-node networks was 0.001 bits, and the mean absolute error for the 16-node networks was less than 0.0005 bits. Red squares are the mean across tested networks, and blue bars indicate standard error of the mean. **D** For our autoregressive time-series, we extrapolated integrated information to infinite observations across all possible bipartitions, and selected the bipartition that minimized *normalized* integrated information extrapolated to infinite observations as the MIB. We then compared these bipartitions to the analytic ground-truth MIBs. Our estimates based on time-series data found the exact (analytic) MIB in 57/60 of the 14-node systems (mean Rand Index = 0.99) and in 56/60 of the 16-node systems (mean Rand Index = 0.98). Thus, we can confidently assume that well-established extrapolation methods work for integrated information. **E** In the structurally severed networks in Fig. 3 of the main paper, there should trivially be 0 bits of integrated information. Yet, as we show here, estimates of  $\Phi^G$  in these networks given finite time-series data often yield results greater than zero. In particular, larger networks seem to result in larger over-estimation of  $\Phi^G$ . This same finding holds for non-extrapolated values across the bipartitions identified by our spectral clustering approach (**F**), which is not surprising, because our approach usually found partitions similar to the ground-truth cuts in these networks (Fig. 3). Using the extrapolation procedure described here, however, mitigates this over-estimation bias and brings estimates of integrated information close to the ground-truth of 0 bits (**G,H**).
