# Supplementary material for: Information integration in large brain networks
Source: PubMed Central journal article supplement (PMC6382174; doi:10.1371/journal.pcbi.1006807), 2019-02-07
Supplement: pcbi.1006807.s007.pdf [file pcbi.1006807.s007.pdf]

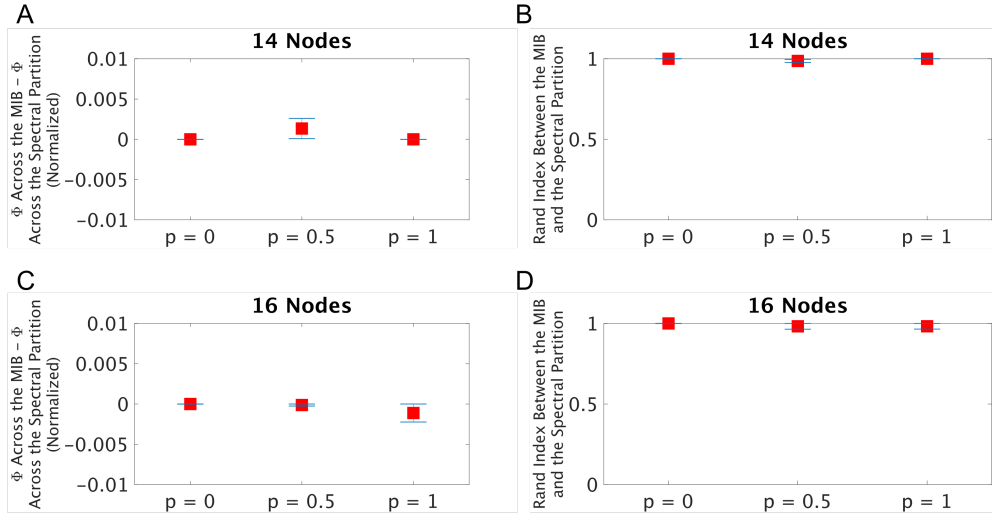

### S6 Figure. Spectral clustering accuracy in Watts-Strogatz networks.

Spectral clustering accurately identifies the MIB of a variety of network types. Here, as in Fig. 5 in the main body of the paper, we followed Watts and Strogatz's method for generating different network types by varying the rewiring probability  $p$  of lattice networks. A  $p$  of 0 yields a perfect lattice network, a  $p$  of 0.5 yields a small-world network, and a  $p$  of 1 yields a random network. Here, we generated 30 lattice ( $p = 0$ ), 30 small-world ( $p = 0.5$ ), and 30 random ( $p = 1$ ) networks, of 14- and 16-nodes in size. With each of these networks, 25,000 time-points of oscillatory time-series data were generated using the stochastic coupled Rössler oscillator model, with the coupling coefficient set to 0.7 for all networks; these simulations yielded multivariate normal dynamics (Fig. S2F-H). We then compared estimates of integrated information across the MIB and across the spectral clustering-based partition for each of the resulting 180 data sets. We found that spectral clustering performed perfectly in all regular lattice ( $p = 0$ ), with perfect matches to the MIB (**B,D**) and no difference from the ground-truth  $\Phi$  (normalized) values (**A,C**) in all tested networks. For the small-world networks ( $p = 0.5$ ), spectral clustering performed perfectly in 28/30 14-node networks (**A,B**) and in 29/30 16-node networks (**C,D**). For the random networks ( $p = 1$ ), spectral clustering performed perfectly in all 14-node networks (**A,B**) and in 29/30 16-node networks (**C,D**). Red squares are the mean across tested networks, and blue bars indicate standard error of the mean. Overall, these results show that spectral clustering can accurately identify the MIB in a variety of network types.
