# Supplementary material for: Information integration in large brain networks
Source: PubMed Central journal article supplement (PMC6382174; doi:10.1371/journal.pcbi.1006807), 2019-02-07
Supplement: pcbi.1006807.s009.pdf [file pcbi.1006807.s009.pdf]

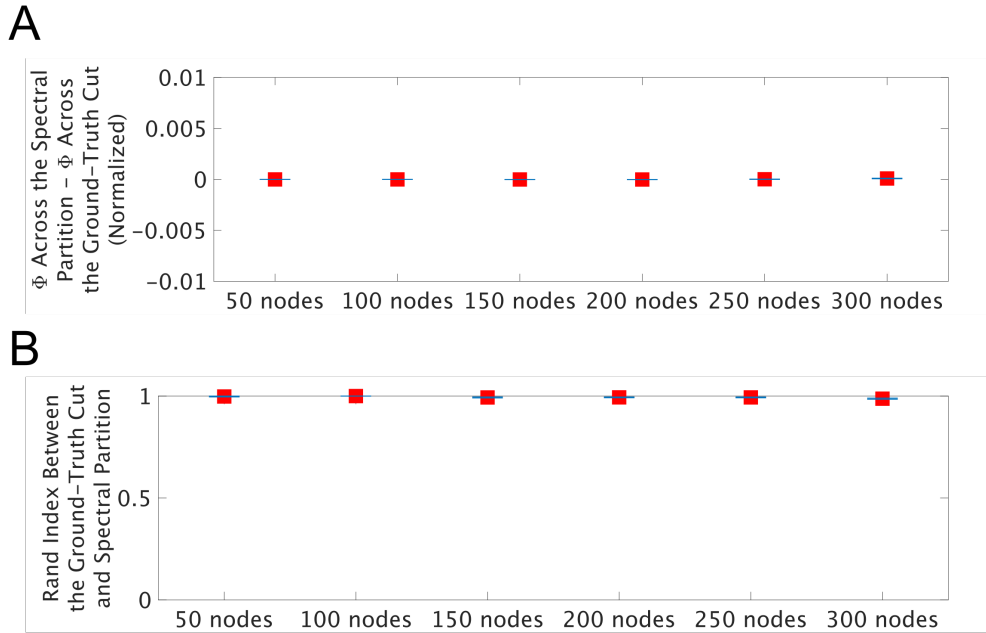

**S8 Figure. Spectral clustering accuracy in large autoregressive systems.** In the main body of the paper, we showed that our spectral clustering-based approach well approximates the MIB of large-cut networks (Fig. 3). To further show that our approach generalizes across a variety of network dynamics, we also used the same large, cut networks used in Fig. 3 to generate a set of autoregressive time-series data, following the same procedure as in Fig. S7. We found that our spectral clustering approach performed almost perfectly in large autoregressive systems: the difference between  $\Phi^G$  across the spectral partitions and  $\Phi^G$  across the ground-truth cuts was 0 for 191/240 networks tested, with the difference less than  $10^{-6}$  bits (normalized) for all network sizes. The spectral partitions were perfect matches to the ground-truth cuts for those same 191/240 networks, with a mean Rand index greater than 0.98 for all network sizes.
